# Supplementary material
Source: Research Square preprint supplement (doi:10.21203/rs.3.rs-9843154/v1)
Supplement: Supplementary file 1 [file 94a7da9f14e7229345e4d0cb.docx]

**Supplementary Table 1. Characteristics of Included Studies (n = 62)**

| **No.** | **Author/Year** | **Country/Region** | **Study Design/Type** | **Major Focus** | **Key Pediatric Cancer(s)** | **Major Contribution to Review** |
| --- | --- | --- | --- | --- | --- | --- |
| 1 | Steliarova-Foucher et al. (2017) | Global including Africa | Population-based registry study | International childhood cancer incidence | Multiple pediatric cancers | Reported global incidence patterns and highlighted African surveillance gaps |
| 2 | Stoeter et al. (2021) | Uganda and Zimbabwe | Registry-based incidence study | Childhood cancer incidence trends | Multiple pediatric cancers | Demonstrated changing incidence trends over 25 years |
| 3 | Kruger et al. (2014) | Africa | Narrative review | Childhood cancer epidemiology | Multiple pediatric cancers | Summarized pediatric cancer burden across Africa |
| 4 | Stefan et al. (2017) | Sub-Saharan Africa | Review article | Childhood cancer epidemiology | Multiple pediatric cancers | Described epidemiological patterns and healthcare challenges |
| 5 | Stefan (2015) | Africa | Review article | Distribution of childhood cancers | Multiple pediatric cancers | Reported geographic distribution of pediatric cancers |
| 6 | Magrath et al. (2013) | LMICs including Africa | Review article | Pediatric cancer in LMICs | Multiple pediatric cancers | Discussed survival disparities and system limitations |
| 7 | Ward et al. (2019) | Global including Africa | Simulation-based analysis | Global childhood cancer burden | Multiple pediatric cancers | Estimated underdiagnosis in Africa |
| 8 | Zhao et al. (2022) | International | Trend analysis | International childhood cancer trends | Multiple pediatric cancers | Reported increasing incidence patterns globally |
| 9 | Bukirwa et al. (2020) | Uganda | Registry study | Cancer incidence trends | Multiple pediatric cancers | Examined long-term cancer incidence patterns |
| 10 | Chokunonga et al. (2013) | Zimbabwe | Registry study | Cancer incidence trends | Multiple pediatric cancers | Reported temporal cancer incidence changes |
| 11 | Owusu et al. (2023) | Ghana | Retrospective observational study | Childhood cancer incidence | Multiple pediatric cancers | Provided recent tertiary hospital incidence data |
| 12 | Paintsil et al. (2015) | Ghana | Hospital-based study | Pediatric cancer patterns | Multiple pediatric cancers | Described distribution of pediatric cancers |
| 13 | Der and Abantanga (2022) | Ghana | Histopathological review | Childhood cancer histology | Multiple pediatric cancers | Reported pathological patterns in Northern Ghana |
| 14 | Endalamaw et al. (2021) | Ethiopia | Hospital-based study | Childhood cancer prevalence | Multiple pediatric cancers | Assessed prevalence in referral hospitals |
| 15 | Slone et al. (2014) | Zambia | Retrospective cohort study | Treatment outcomes and abandonment | Multiple pediatric cancers | Reported treatment abandonment challenges |
| 16 | Olbara et al. (2020) | Kenya | Observational study | Insurance and treatment outcomes | Multiple pediatric cancers | Examined impact of health insurance |
| 17 | Renner et al. (2018) | Ghana | Economic evaluation | Cost-effectiveness of pediatric oncology | Multiple pediatric cancers | Demonstrated value of childhood cancer treatment |
| 18 | Petricca et al. (2024) | East Africa | Policy analysis | Access to cancer medicines | Multiple pediatric cancers | Highlighted medicine procurement barriers |
| 19 | Mullen et al. (2021) | Global | Review article | Timeliness of diagnosis and treatment | Multiple pediatric cancers | Discussed delayed diagnosis challenges |
| 20 | Nurhidayah et al. (2025) | Global including LMICs | Scoping review | Treatment-seeking behavior | Multiple pediatric cancers | Examined caregiver barriers to care |
| 21 | Bekui et al. (2023) | Ghana | Qualitative study | Caregiver burden | Multiple pediatric cancers | Described socioeconomic burden on caregivers |
| 22 | Moore et al. (2024) | Global | Cross-sectional study | Health literacy | Multiple pediatric cancers | Explored caregiver literacy and distress |
| 23 | García-Quintero et al. (2023) | Latin America/global relevance | Program evaluation | Health literacy interventions | Multiple pediatric cancers | Discussed quality-of-life education approaches |
| 24 | Davidson et al. (2014) | South Africa | Observational study | HIV-associated malignancies | Kaposi sarcoma, lymphomas | Linked HIV to pediatric malignancies |
| 25 | Bohlius et al. (2016) | South Africa | Record linkage study | Cancer incidence in HIV-positive children | AIDS-defining cancers | Examined HIV-related cancer incidence |
| 26 | Olp et al. (2015) | Zambia | Observational study | ART and KSHV transmission | Kaposi sarcoma | Assessed ART effects on KSHV transmission |
| 27 | Hämmerl et al. (2019) | Africa | Review article | Burden of Burkitt lymphoma | Burkitt lymphoma | Summarized epidemiology across Africa |
| 28 | Ogwang et al. (2008) | Uganda | Epidemiological study | Geographic distribution of Burkitt lymphoma | Burkitt lymphoma | Linked endemic Burkitt lymphoma to malaria zones |
| 29 | Ogwang et al. (2011) | Uganda | Epidemiological study | Malaria biomarkers and Burkitt lymphoma | Burkitt lymphoma | Identified malaria correlations |
| 30 | Kotepui and Kotepui (2021) | Africa | Systematic review and meta-analysis | Malaria and Burkitt lymphoma risk | Burkitt lymphoma | Synthesized malaria-associated risk evidence |
| 31 | Arisue et al. (2021) | Malawi | Case-control study | Plasmodium falciparum infection | Burkitt lymphoma | Investigated malaria-related mechanisms |
| 32 | Derkach et al. (2019) | Ghana and Uganda | Case-control study | PfEMP1 and Burkitt lymphoma | Burkitt lymphoma | Examined immunologic associations |
| 33 | Wakeham et al. (2013) | Uganda | Observational study | KSHV seropositivity | Kaposi sarcoma | Investigated KSHV risk factors |
| 34 | Nalwoga et al. (2018) | Uganda | Population-based study | Anemia, malaria, and KSHV | Kaposi sarcoma | Linked co-infections with KSHV |
| 35 | Nalwoga et al. (2019) | Uganda | Observational study | Parasite infections and KSHV | Kaposi sarcoma | Examined infectious determinants |
| 36 | Dollard et al. (2010) | Sub-Saharan Africa | Seroprevalence study | HHV-8 regional variation | Kaposi sarcoma | Identified geographic differences |
| 37 | Naresh et al. (2011) | Sub-Saharan Africa | Review article | Lymphoma diagnosis and management | Lymphomas | Highlighted pathology challenges |
| 38 | Cunningham et al. (2020) | Global including Africa | Review article | Global disparities in Wilms tumor | Wilms tumor | Described outcome disparities |
| 39 | Axt et al. (2011) | International | Epidemiological study | Race disparities in Wilms tumor | Wilms tumor | Explored biological disparities |
| 40 | Wong et al. (2014) | United States/global relevance | Incidence study | Retinoblastoma incidence | Retinoblastoma | Provided comparative epidemiological data |
| 41 | Yun et al. (2011) | Global | Review article | Retinoblastoma epidemiology | Retinoblastoma | Discussed RB1 genetics and epidemiology |
| 42 | O’Brien (2001) | Global | Clinical review | Retinoblastoma presentation | Retinoblastoma | Highlighted diagnostic presentation |
| 43 | Balmer and Munier (2007) | Global | Clinical review | Leukocoria and strabismus | Retinoblastoma | Discussed early diagnostic indicators |
| 44 | Linet et al. (2016) | International | Trend analysis | Leukemia and lymphoma trends | Leukemias and lymphomas | Reported international incidence patterns |
| 45 | Eden (2010) | Global | Review article | Etiology of childhood leukemia | Leukemia | Summarized etiological mechanisms |
| 46 | Greaves (1997) | Global | Review article | Acute leukemia etiology | Leukemia | Provided foundational etiological framework |
| 47 | Parkin and Stefan (2017) | Sub-Saharan Africa | Editorial review | Childhood cancer burden | Multiple pediatric cancers | Discussed surveillance limitations |
| 48 | Gakunga and Parkin (2015) | Africa | Survey study | Cancer registries in Africa | Cancer surveillance | Evaluated registry operational capacity |
| 49 | Jedy-Agba et al. (2015) | Nigeria | Program report | National cancer registration | Cancer surveillance | Described registry development efforts |
| 50 | Parkin and Bray (2009) | International | Methodological review | Registry data quality | Cancer surveillance | Discussed completeness assessment |
| 51 | Steliarova-Foucher et al. (2024) | International | Methodological report | Data quality and comparability | Cancer surveillance | Addressed registry comparability issues |
| 52 | Parkin et al. (2021) | Sub-Saharan Africa | Registry study | Stage at diagnosis and survival | Multiple pediatric cancers | Examined staging and survival outcomes |
| 53 | Mallon et al. (2023) | Sub-Saharan Africa | Multicenter study | Toronto staging guidelines | Multiple pediatric cancers | Assessed staging feasibility |
| 54 | Gupta et al. (2016) | International | Consensus guideline | Pediatric cancer staging | Multiple pediatric cancers | Established Toronto staging principles |
| 55 | Aitken et al. (2018) | International | Registry validation study | Toronto staging feasibility | Multiple pediatric cancers | Validated staging guidelines |
| 56 | Botta et al. (2021) | Europe/global relevance | Population-based study | Childhood cancer staging | Neuroblastoma and Wilms tumor | Applied Toronto staging principles |
| 57 | Botta et al. (2023) | Europe | Population-based survival study | Long-term childhood cancer survival | Multiple pediatric cancers | Provided comparative survival data |
| 58 | Ortiz et al. (2023) | Global including Africa | Programmatic review | WHO Global Initiative for Childhood Cancer | Multiple pediatric cancers | Discussed strengthening pediatric oncology care |
| 59 | WHO (2021) | Global including Africa | WHO report | Childhood cancer control | Multiple pediatric cancers | Highlighted global childhood cancer initiatives |
| 60 | WHO (2025) | Global | WHO fact sheet | Childhood cancer burden | Multiple pediatric cancers | Provided current global burden estimates |
| 61 | AFCRN (2020) | Africa | Institutional report | Cancer registry standards | Cancer surveillance | Defined membership and registry criteria |
| 62 | Srivastava et al. (2020) | Global including LMICs | Workforce analysis | Cancer workforce capacity | Pediatric oncology systems | Highlighted oncology workforce shortages |

**Abbreviations**

AFCRN = African Cancer Registry Network; ART = antiretroviral therapy; EBV = Epstein–Barr virus; HIV = human immunodeficiency virus; IARC = International Agency for Research on Cancer; KSHV = Kaposi sarcoma-associated herpesvirus; LMICs = low- and middle-income countries; WHO = World Health Organization.

**Note**

This supplementary table summarizes the major characteristics and contributions of the studies included in the scoping review synthesis. Several international studies and methodological reports were retained because of their relevance to pediatric cancer epidemiology, surveillance systems, staging frameworks, and prevention and control strategies applicable to African settings.
